# Supplementary material for: A Novel Affinity Engineered Anti-CD47 Antibody With Improved Therapeutic Index That Preserves Erythrocytes and Normal Immune Cells
Source: PubMed Central journal article supplement (PMC9161735; doi:10.3389/fonc.2022.884196), 2022-05-19

# Supplementary Figure 1

**a**

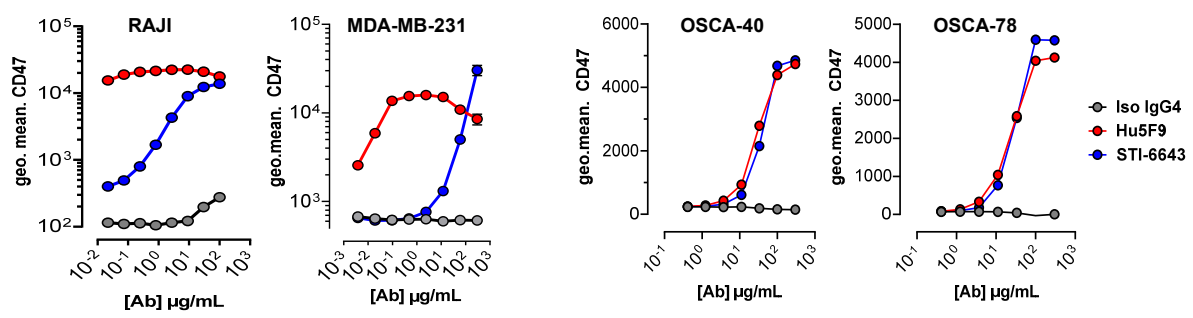

| EC50 values (µg/mL) | Isotype IgG4 | STI-6643 | Hu5F9 |
|---------------------|--------------|----------|-------|
| RAJI                | NM           | 6.638    | NM    |
| MDA-MB-231          | NM           | NM       | NM    |
| OSCA-40             | NM           | 34.9     | 26.5  |
| OSCA-78             | NM           | 27.6     | 22.7  |

NM=Not measurable (no full dose-response curve to accurately calculate EC50)

**b**

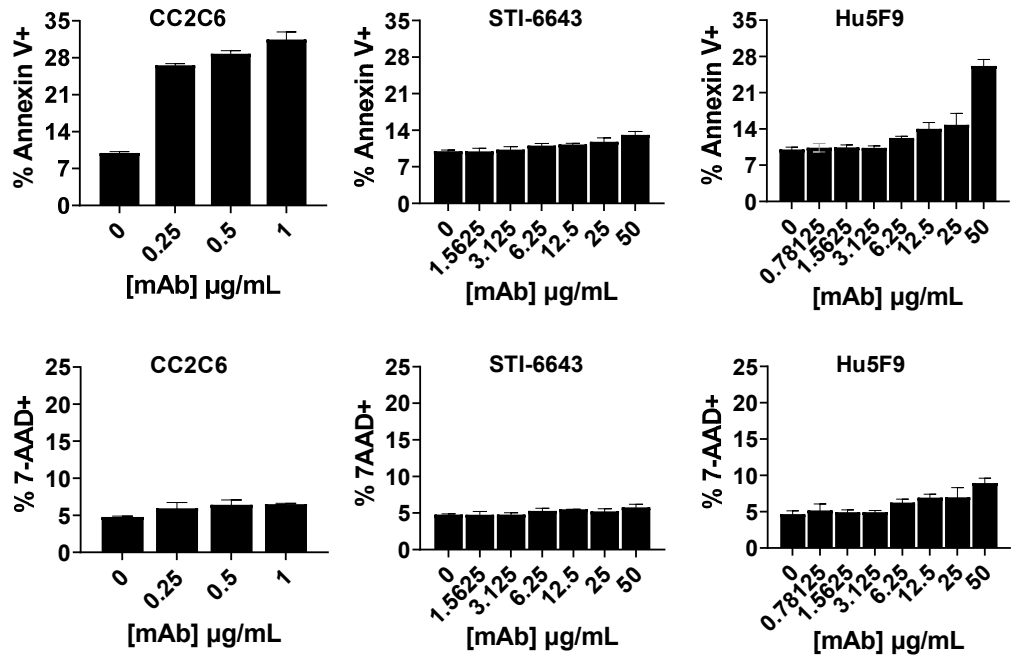

# Supplementary Figure 2

**a**

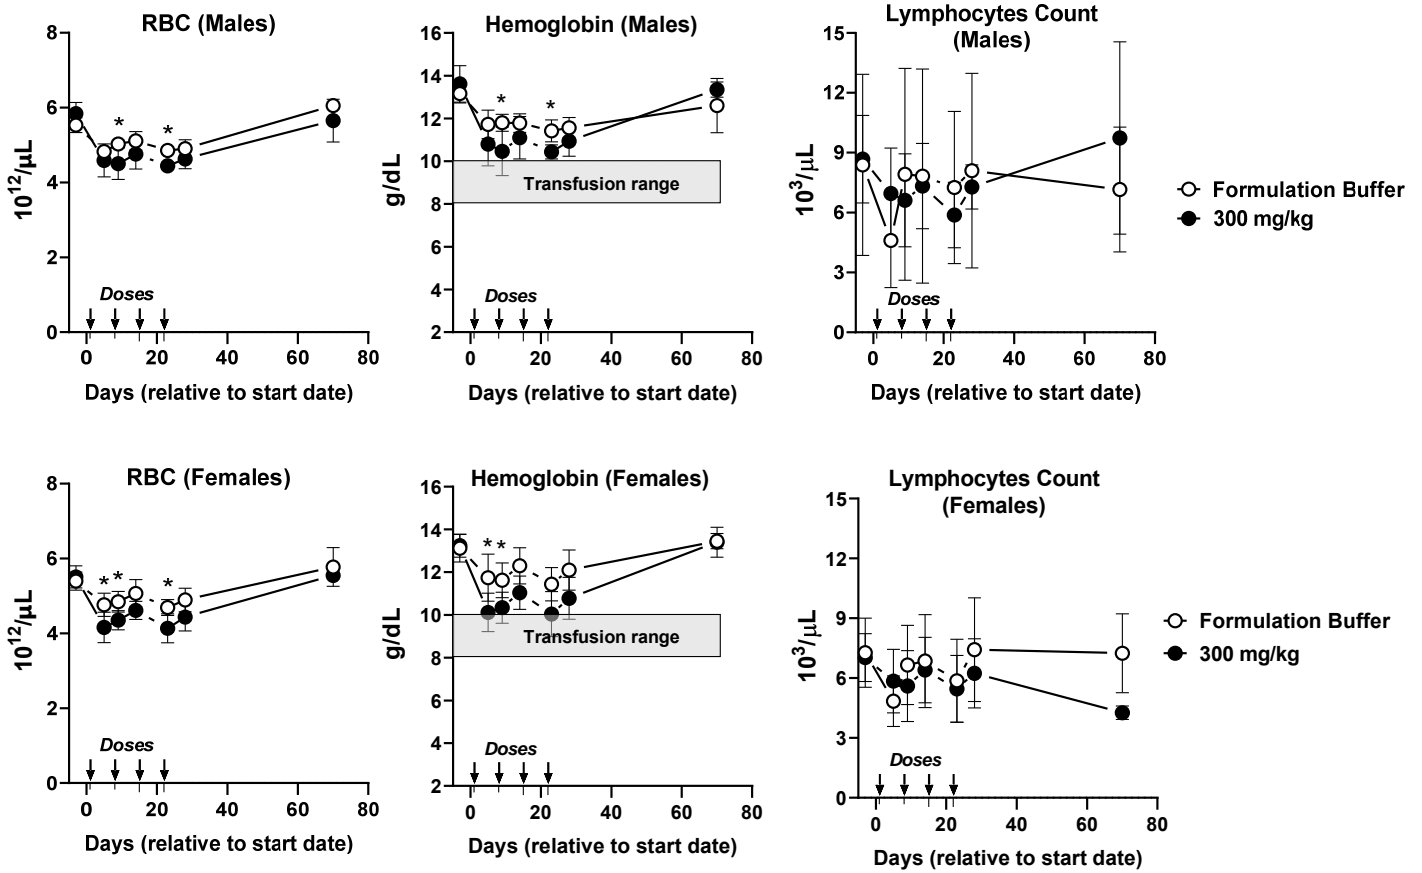

**b**

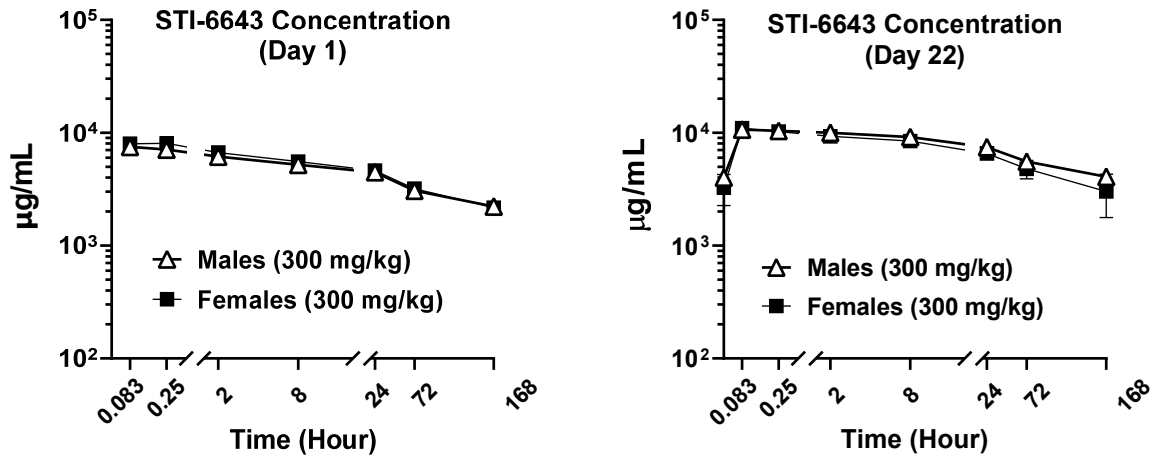

**c**

| Gender | Date | Number of Animals | Dose (mg/kg) | $T_{\max}$ |     |     | $C_{\max}$ ( $\mu\text{g/mL}$ ) |       |        | $AUC_{(0-168\text{ h})}$ ( $\text{h} \cdot \mu\text{g/mL}$ ) |       |           | $T_{1/2}$ (Hours) |       |    |
|--------|------|-------------------|--------------|------------|-----|-----|---------------------------------|-------|--------|--------------------------------------------------------------|-------|-----------|-------------------|-------|----|
|        |      |                   |              | Median     | Min | Max | Mean                            | $\pm$ | SD     | Mean                                                         | $\pm$ | SD        | Mean              | $\pm$ | SD |
| Female | D1   | 5                 | 300          | 2          | 2   | 2   | 6685.86                         | $\pm$ | 452.08 | 571136.90                                                    | $\pm$ | 43665.05  | 102               | $\pm$ | 0  |
|        | D22  | 5                 | 300          | 2          | 2   | 8   | 9351.43                         | $\pm$ | 960.26 | 835329.19                                                    | $\pm$ | 146799.64 | 56.7              | $\pm$ | 0  |
| Male   | D1   | 5                 | 300          | 2          | 2   | 8   | 6162.70                         | $\pm$ | 775.91 | 552376.17                                                    | $\pm$ | 43909.21  | NC                | $\pm$ | NC |
|        | D22  | 5                 | 300          | 2          | 2   | 2   | 10012.39                        | $\pm$ | 455.76 | 981030.99                                                    | $\pm$ | 109375.75 | NC                | $\pm$ | NC |

NC: Not calculable (the concentration of STI-6643 in Cynomolgus monkey plasma has not reached the elimination phase, and the accurate half-life cannot be calculated).

# Supplementary Figure 3

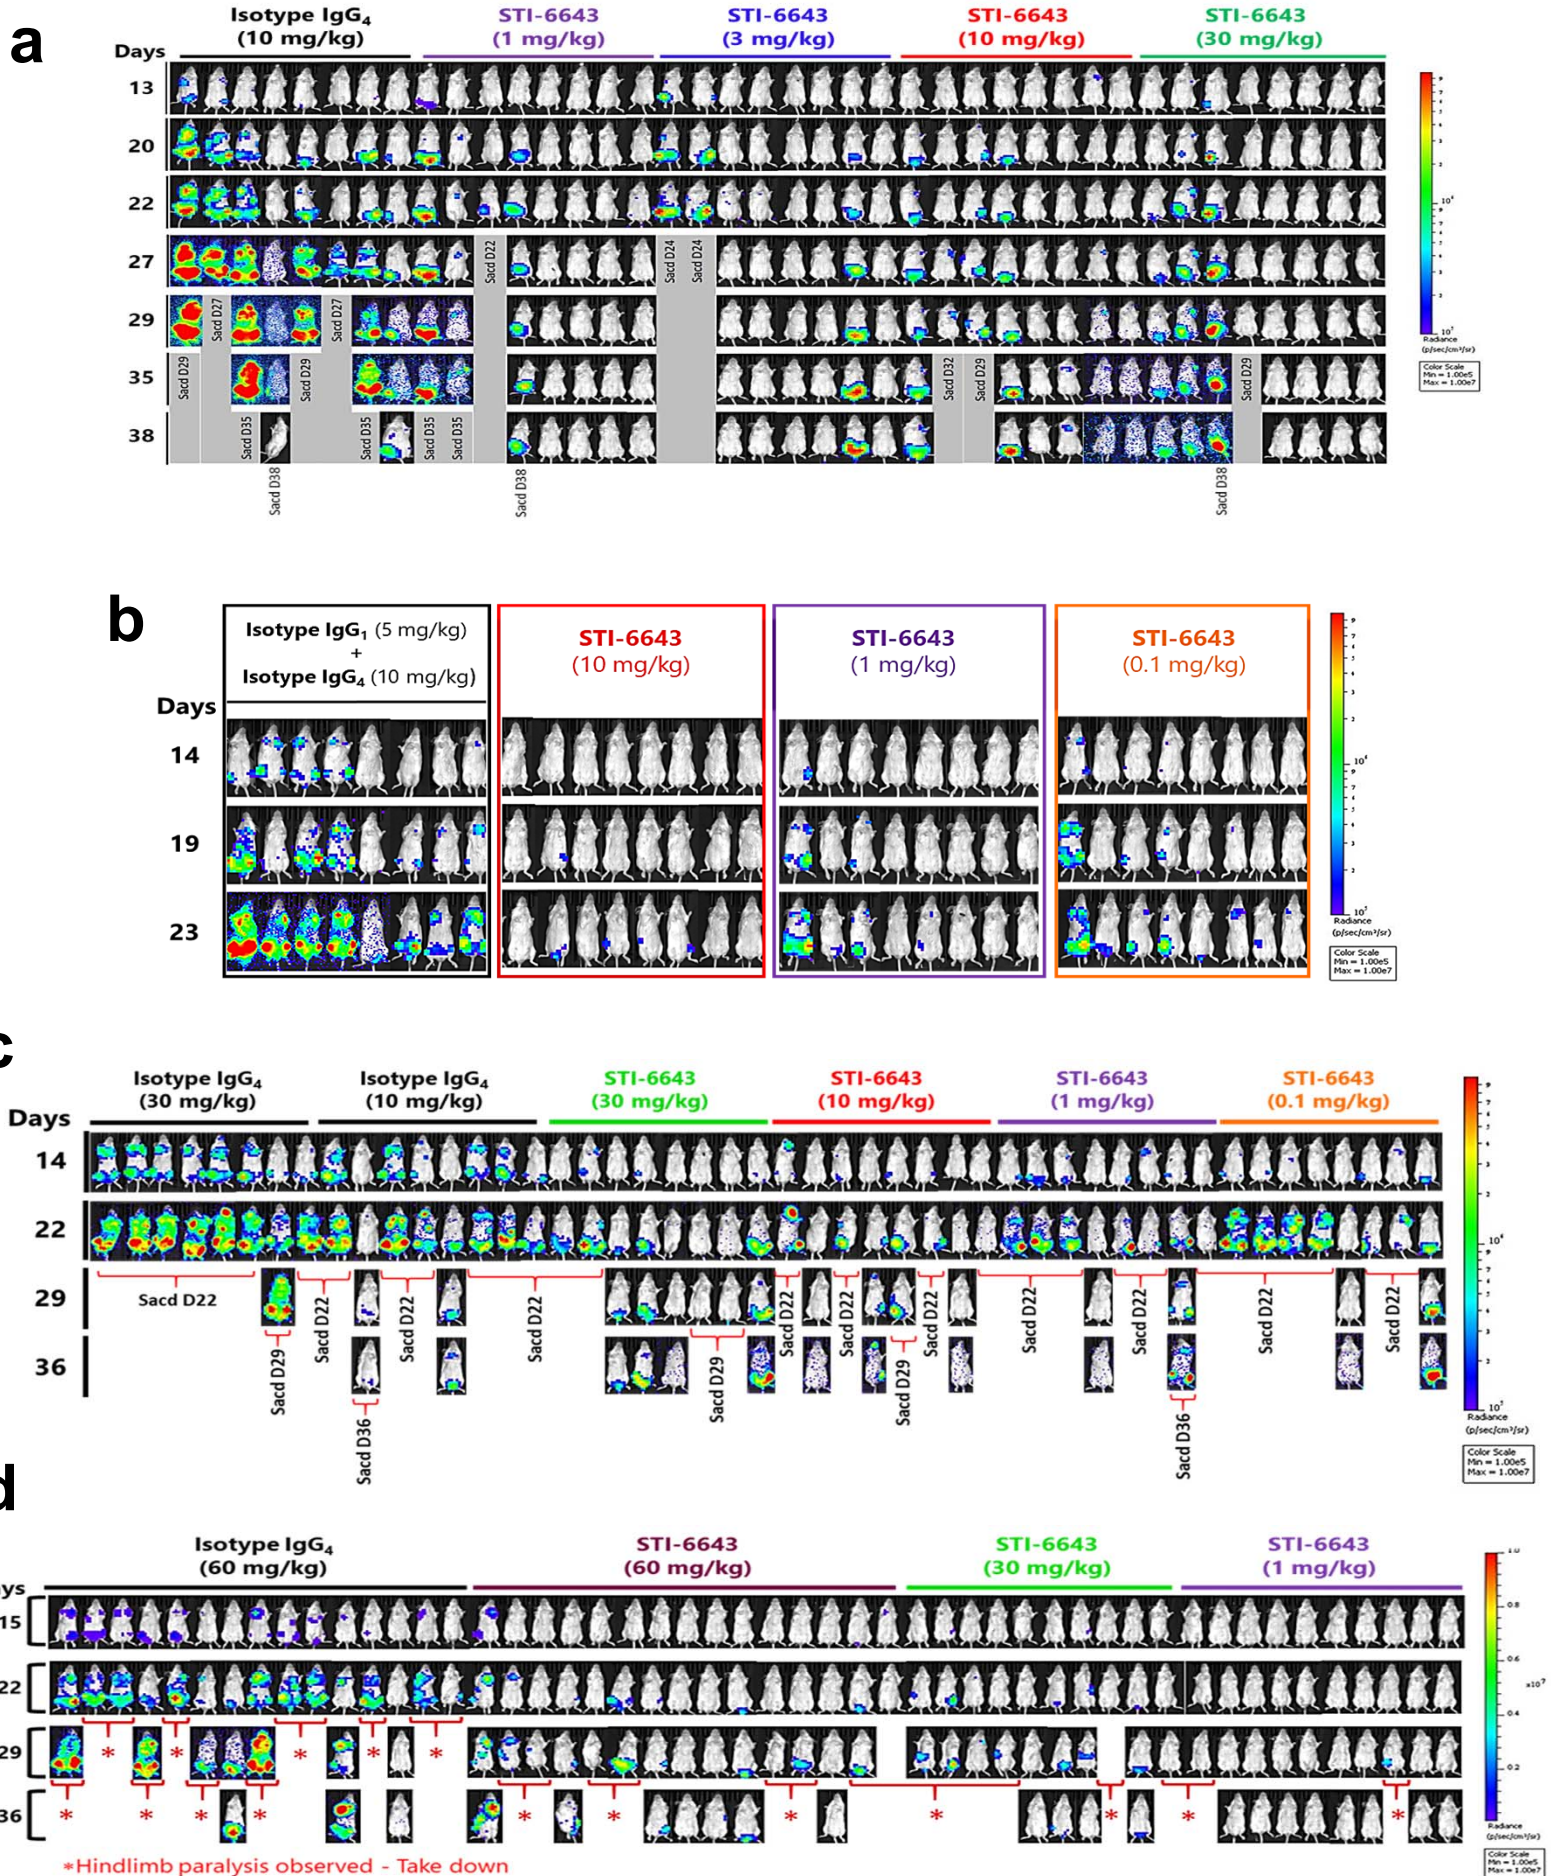

# Supplementary Figure 4

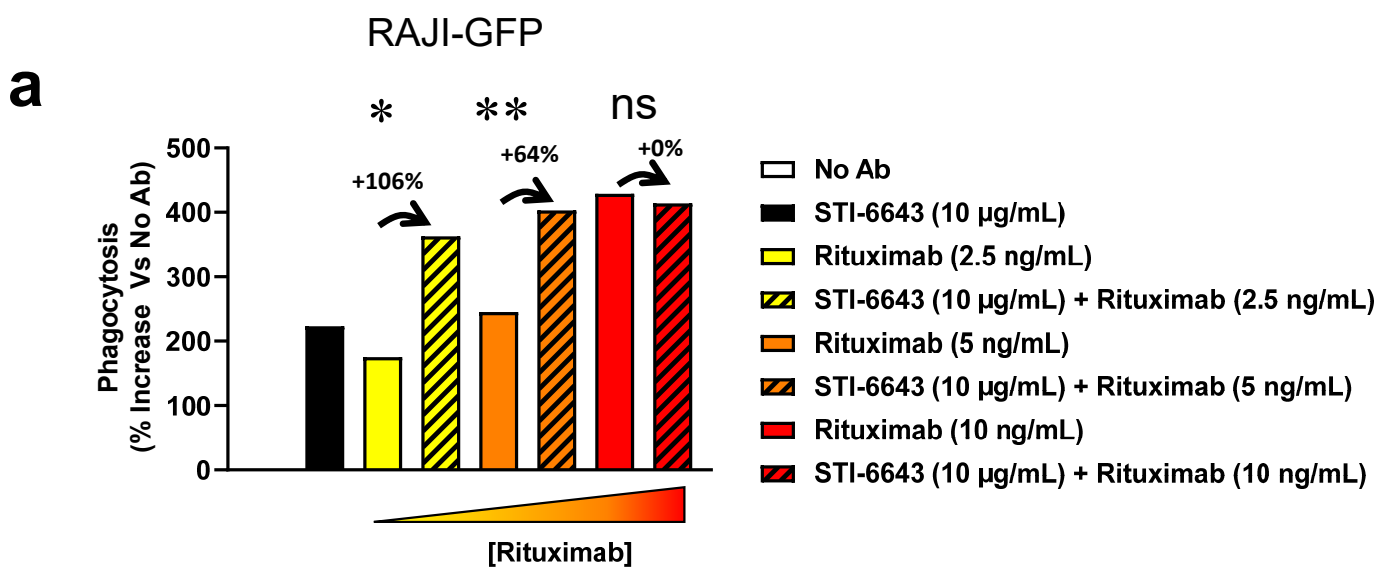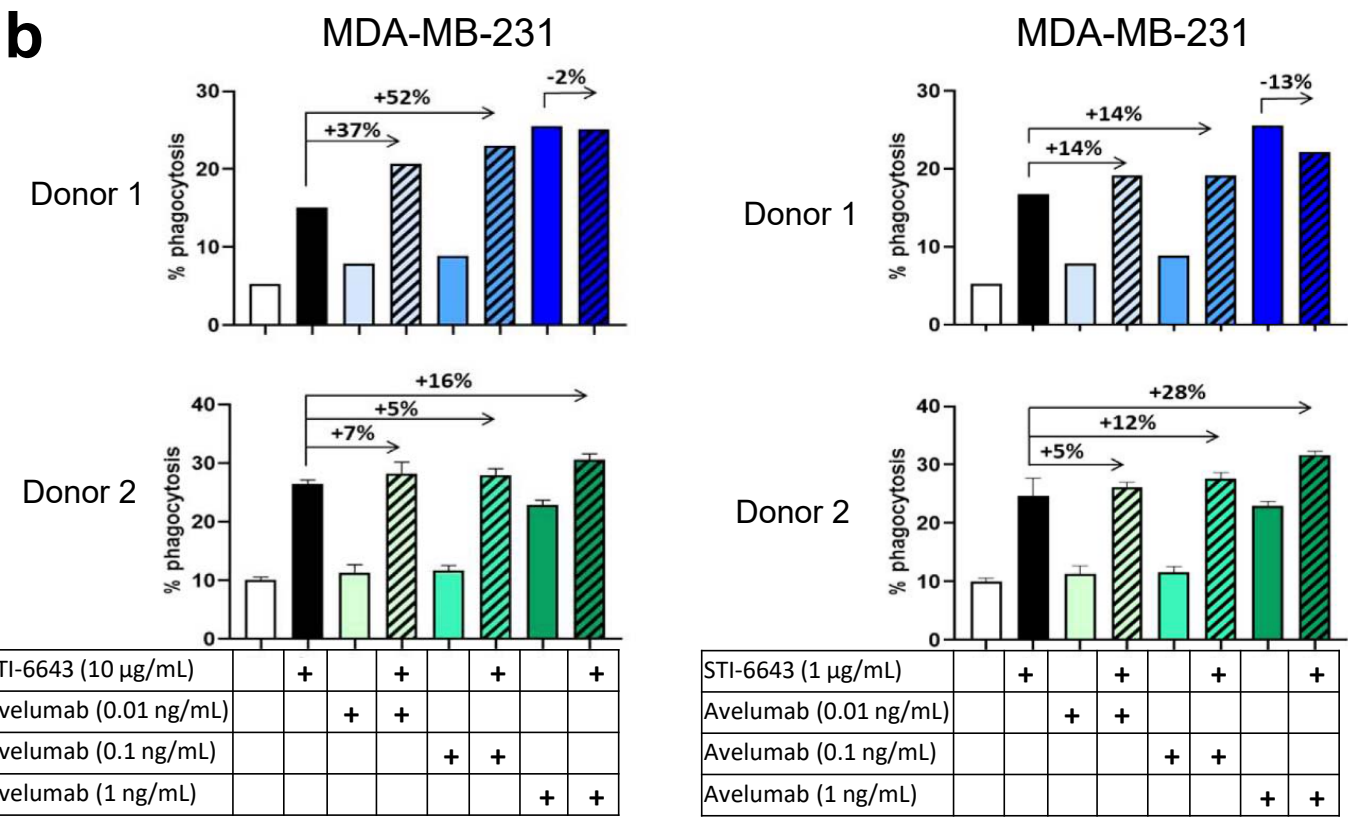

# Supplementary Figure 5

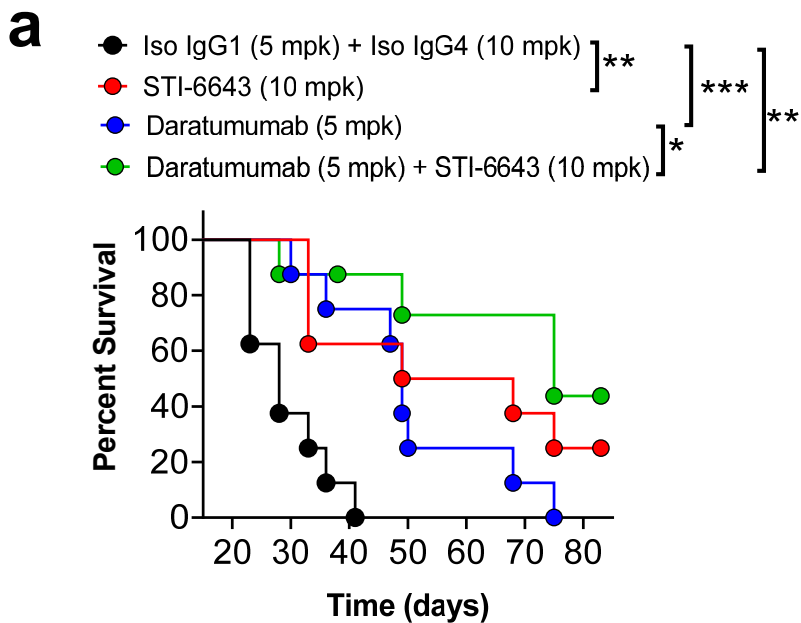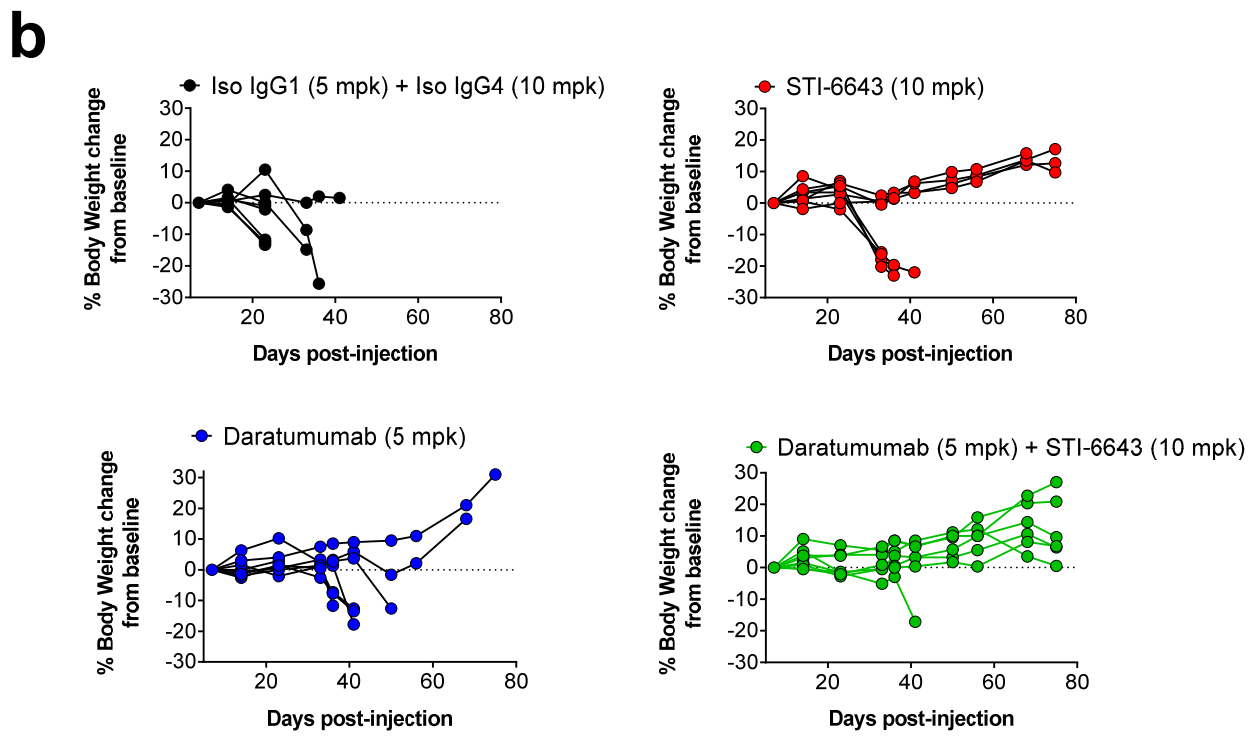

# Supplementary Figure 6

**a**

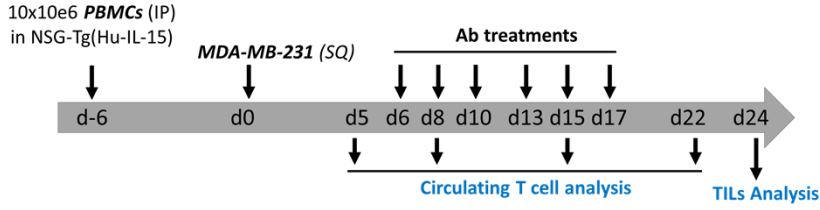

**b**

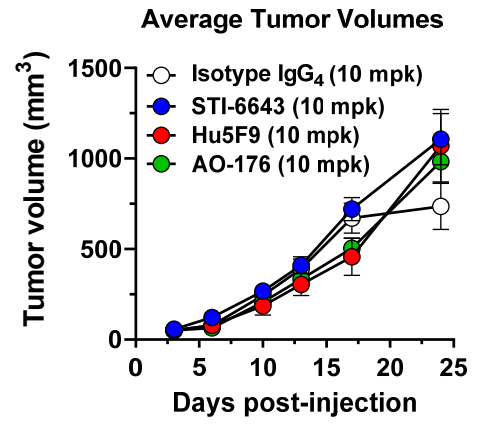

**c**

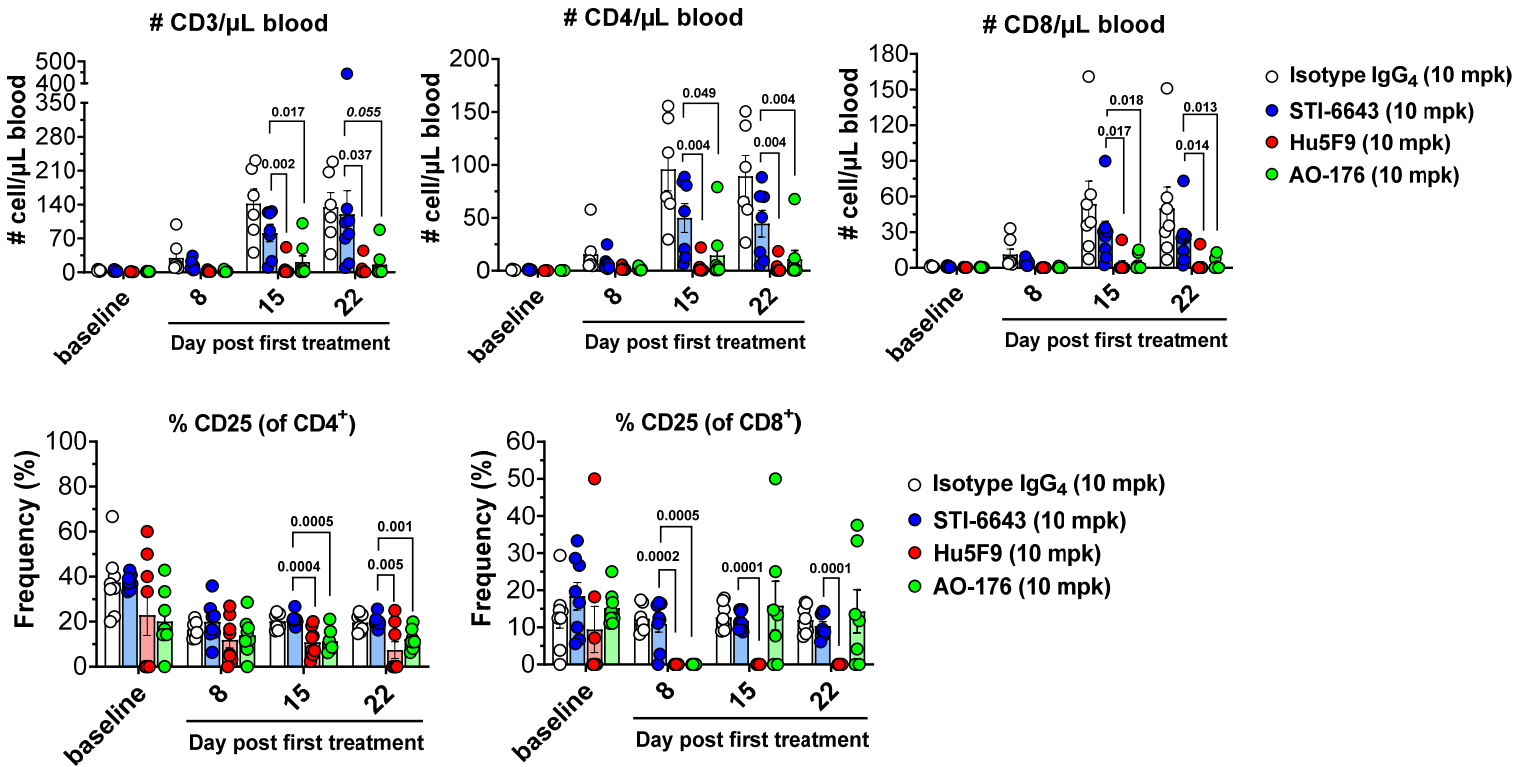

**d**

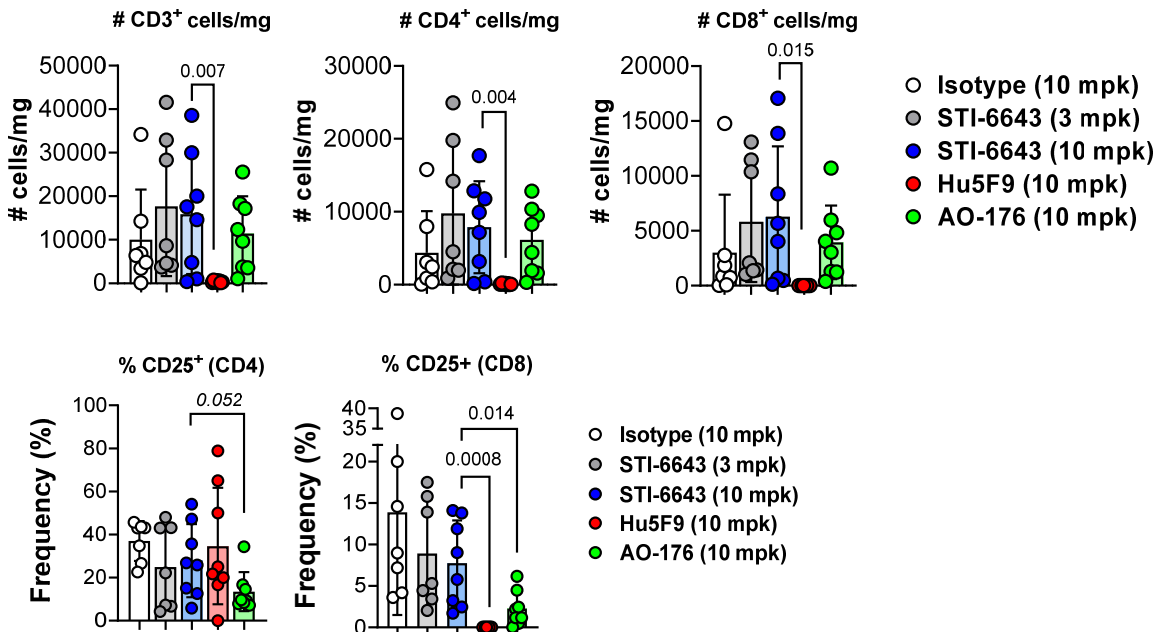

Supplement: DataSheet_1.pdf [file DataSheet_1.pdf]
